# Supplementary material for: Diboronic-Acid-Based Electrochemical Sensor for Enzyme-Free Selective and Sensitive Glucose Detection
Source: MDPI journal article supplement (doi:10.3390/bios13020248), 2023-02-09
Supplement: s1 [file s1]

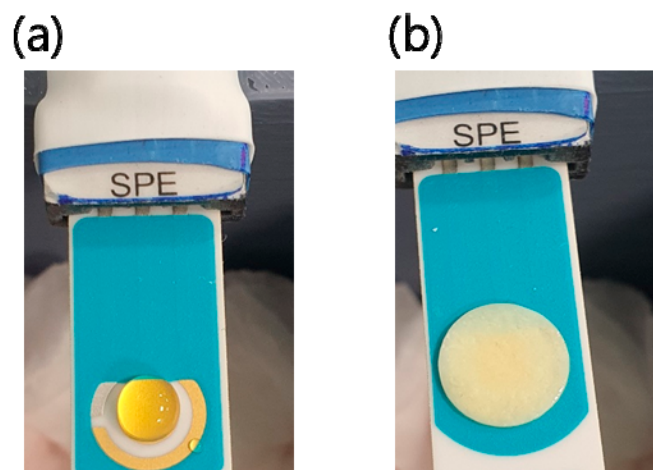

**Figure S1.** Pictures showing 20  $\mu\text{L}$  of sample drops on the electrode surfaces **(a)** without and **(b)** with the asymmetric membrane.
